# Supplementary material for: Objectively Measured Physical Activity, Sedentary Behavior and Functional Performance before and after Lower Limb Joint Arthroplasty: A Systematic Review with Meta-Analysis
Source: MDPI journal article supplement (doi:10.3390/jcm10245885), 2021-12-15
Supplement: s1 [file s1]

Table S1. The study quality assessment.

|                    | Aim                      | Subjects             |                    |                    |                     |                                           | Assessment               |                  |                                |                                       |                                            |                                               | Cofounding | Statistical analysis with CI | Overall quality |
|--------------------|--------------------------|----------------------|--------------------|--------------------|---------------------|-------------------------------------------|--------------------------|------------------|--------------------------------|---------------------------------------|--------------------------------------------|-----------------------------------------------|------------|------------------------------|-----------------|
|                    | 1.1                      | 1.2                  | 1.3                | 1.4                | 1.5                 | 1.6                                       | 1.7                      | 1.8              | 1.9                            | 1.10                                  | 1.11                                       | 1.12                                          |            |                              |                 |
|                    | Clearly Focused Question | Groups Comparability | Participation Rate | Participation Bias | Attrition Rate/Bias | Comparison of Full & Partial Participants | Clearly Defined Outcomes | Blind Assessment | Comparison of Process Measures | Reliability of assessment of measures | Validity & Reliability of Outcome Measures | More than one assessment of prognostic factor |            |                              |                 |
| Bade 2014 [46]     | Y                        | Y                    | Y                  | N/A                | N                   | N                                         | Y                        | N/A              | Y                              | Y                                     | Y                                          | N/A                                           | Y          | N                            | +               |
| Brandes 2011 [47]  | Y                        | N/A                  | N/A                | N/A                | 12-40%              | Y                                         | Y                        | N/A              | Y                              | Y                                     | Y                                          | N/A                                           | Y          | N                            | +               |
| Caliskan 2020 [48] | Y                        | N/A                  | N/A                | N/A                | N                   | N                                         | Y                        | N/A              | Y                              | Y                                     | Y                                          | N/A                                           | Y          | N                            | +               |
| Casazza 2019 [49]  | Y                        | Y                    | N/A                | Y                  | N                   | N                                         | Y                        | CS               | Y                              | Y                                     | Y                                          | N/A                                           | Y          | N                            | +               |
| Cooper 2017 [50]   | Y                        | Y                    | Y                  | N/A                | 80%                 | Y                                         | Y                        | CS               | Y                              | Y                                     | Y                                          | Y                                             | Y          | Y                            | ++              |
| Daugaard 2018 [51] | Y                        | Y                    | N/A                | N/A                | N/A                 | N/A                                       | Y                        | N                | N                              | Y                                     | Y                                          | N/A                                           | Y          | Y                            | +               |
| Dayton 2016 [52]   | Y                        | N/A                  | N/A                | N/A                | N                   | N/A                                       | Y                        | N/A              | Y                              | Y                                     | Y                                          | Y                                             | Y          | N                            | +               |
| De Groot 2008 [53] | Y                        | N/A                  | N/A                | N/A                | 4%                  | N/A                                       | Y                        | N/A              | Y                              | Y                                     | Y                                          | Y                                             | Y          | N                            | +               |
| Dominick 2018 [54] | Y                        | N/A                  | N/A                | N/A                | 16%                 | Y                                         | Y                        | N/A              | Y                              | Y                                     | Y                                          | Y                                             | Y          | Y                            | ++              |
| Frimpong 2019 [32] | Y                        | N/A                  | N/A                | N/A                | 8%; 22%; 38%        | N/A                                       | Y                        | N/A              | Y                              | Y                                     | Y                                          | Y                                             | Y          | Y                            | ++              |
| Frimpong 2020 [55] | Y                        | N/A                  | N/A                | N/A                | 33%; 41%            | N/A                                       | Y                        | N/A              | Y                              | Y                                     | Y                                          | N                                             | Y          | Y                            | +               |

|                               |   |     |     |     |          |     |   |     |     |    |   |     |   |   |    |
|-------------------------------|---|-----|-----|-----|----------|-----|---|-----|-----|----|---|-----|---|---|----|
| Fujita<br>2013 [26]           | Y | Y   | N/A | N/A | 39%      | N/A | Y | N   | Y   | Y  | Y | N   | Y | N | +  |
| Guedes<br>2011 [29]           | Y | Y   | N   | N/A | N        | N/A | Y | N   | Y   | Y  | Y | N/A | Y | N | +  |
| Güler<br>2019 [31]            | Y | Y   | N   | N/A | 7%       | CS  | Y | N   | N/A | Y  | Y | N   | Y | Y | +  |
| Hawke<br>2019 [36]            | Y | N/A | N/A | N/A | 25%; 32% | Y   | Y | N/A | Y   | Y  | Y | CS  | Y | N | +  |
| Heiberg<br>2013 [56]          | Y | N/A | N/A | N/A | 6%       | N/A | Y | N/A | Y   | Y  | Y | Y   | Y | Y | +  |
| Höll 2018<br>[33]             | Y | N/A | N/A | N/A | N        | N/A | Y | N/A | Y   | Y  | Y | N   | Y | N | +  |
| Jeldi 2017<br>[57]            | Y | N/A | N/A | N/A | 53%      | N/A | Y | N/A | Y   | Y  | Y | CS  | Y | N | +  |
| Kahn<br>2015 [58]             | Y | Y   | N/A | N/A | N/A      | N/A | Y | N/A | Y   | Y  | Y | N/A | Y | N | +  |
| Ko 2013<br>[30]               | Y | Y   | Y   | N/A | N/A      | N/A | Y | N/A | Y   | Y  | Y | N/A | Y | Y | ++ |
| Kuhn<br>2013 [59]             | Y | N/A | N/A | N/A | 67%      | N   | Y | N/A | Y   | CS | Y | Y   | Y | N | +  |
| Lin 2013<br>[60]              | Y | N/A | N/A | N/A | N        | N/A | Y | N/A | Y   | CS | Y | Y   | Y | N | +  |
| Lützner<br>2014 [61]          | Y | Y   | N   | N/A | 27%      | N/A | Y | N/A | Y   | Y  | Y | Y   | Y | Y | ++ |
| Lützner<br>2016 [62]          | Y | N/A | N/A | N/A | 27%      | N   | Y | N/A | Y   | Y  | Y | N   | Y | N | +  |
| Matsunaga-Myoji<br>2019 [27]  | Y | Y   | N/A | N/A | N        | N   | Y | N   | N/A | Y  | Y | N   | Y | N | 0  |
| Matsunaga-Myoji<br>2020a [63] | Y | N/A | N/A | N/A | 14%; 38% | N/A | Y | N/A | Y   | Y  | Y | Y   | Y | Y | ++ |

|                            |   |     |     |     |                    |     |   |     |   |   |   |   |   |   |    |
|----------------------------|---|-----|-----|-----|--------------------|-----|---|-----|---|---|---|---|---|---|----|
| Matsunaga-Myoji 2020b [64] | Y | N/A | N/A | N/A | 24%; 38%           | N/A | Y | N/A | Y | Y | Y | Y | Y | Y | ++ |
| Moellenbeck 2020a [38]     | Y | N/A | N/A | N/A | N                  | N/A | Y | N/A | Y | Y | Y | N | Y | Y | +  |
| Moellenbeck 2020b [28]     | Y | Y   | N/A | N/A | N                  | N/A | Y | N/A | Y | Y | Y | N | Y | Y | +  |
| Oka 2020 [35]              | Y | N/A | N/A | N/A | 33%                | N/A | Y | N/A | Y | Y | Y | N | Y | N | +  |
| Rezzadeh 2019 [65]         | Y | Y   | N/A | N/A | N                  | N/A | Y | N/A | Y | Y | Y | Y | Y | N | +  |
| Thewlis 2019 [34]          | Y | N/A | N/A | N/A | 12%; 16%; 20%; 22% | N   | Y | N/A | Y | Y | Y | N | Y | N | +  |
| Tobinaga 2019 [37]         | Y | N/A | N/A | N/A | N                  | N/A | Y | N/A | Y | Y | Y | N | Y | N | +  |
| Twiggs 2018 [66]           | Y | N/A | N/A | N/A | 27%;25%; 25%       | N/A | Y | N/A | Y | Y | Y | N | Y | N | +  |
| Vissers 2013 [67]          | Y | N/A | N/A | N/A | 46%                | N/A | Y | N/A | Y | Y | Y | N | Y | N | +  |
